# Supplementary material for: A New Family of Transcriptional Regulators Activating Biosynthetic Gene Clusters for Secondary Metabolites
Source: MDPI journal article supplement (doi:10.3390/ijms23052455), 2022-02-23
Supplement: s1 [file s1]

## Supplementary Materials

**International Journal of Molecular Sciences; section: Molecular Microbiology; special issue: Bacterial Regulatory Proteins**

**A new family of transcriptional regulators activating biosynthetic gene clusters for secondary metabolites**

Renata Novakova, Erik Mingyar, Lubomira Feckova, Dagmar Homerova, Dominika Csolleiova, Bronislava Rezuchova, Beatrica Sevcikova, Rachel Javorova, Jan Kormanec\*

Institute of Molecular Biology, Slovak Academy of Sciences, 845 51 Bratislava, Slovak Republic.

\* Correspondence and reprints: [jan.kormanec@savba.sk](mailto:jan.kormanec@savba.sk), Tel.: +421 (2) 59307419,  
ORCID ID: 0000-0003-0377-6413

|                                                                                        |      |
|----------------------------------------------------------------------------------------|------|
| Table of contents                                                                      | Page |
| Figure S1: Comparison of AurIP with similar atypical response regulators from the BGCs | 2    |
| Figure S2: A comparison of AurIO with similar proteins from unknown BGCs               | 4    |
| Table S1: Oligonucleotides used in this study.                                         | 5    |

|           |   |                                                             |
|-----------|---|-------------------------------------------------------------|
| Aur1P     | 1 | -----MNQRTMAVLEPHTVAAG-ANGGFSPAEGPRTPOHVPA                  |
| FarR1     | 1 | -----MNQRTFAVLEPHTTAAGTANGAFLPAEGLRVPPHAPA                  |
| PgaR1     | 1 | -----MNQQVIDPLGPHRTKRHRPSTPLPRHAATPTPRLPQASAA               |
| Med-ORF30 | 1 | -----                                                       |
| Chai      | 1 | -----MRSDALLTVIARTEHQE                                      |
| GcnR      | 1 | -----MRNASVRPEAR                                            |
| SchA25    | 1 | MGEYRMSNQSTKFLPAIPQQLANRRAPTSPRPVSQHAQQHPPIQAQQLPPIQAQPQLRK |

  

|           |    |                                                                |
|-----------|----|----------------------------------------------------------------|
| Aur1P     | 37 | QSALWRLILIVESNSAEAEETLARGLRHGHVEVDIVGTGGEALRVYAEADLVLLDLELPDLD |
| FarR1     | 38 | QSALWRLILIVESSTVEAEETLARGLRHGHVEVDIVGTGSEALRGYADADLVLLDLELPDLD |
| PgaR1     | 41 | EHRALRVLVVENEAAAADALVQGLMRQGHHAHVDTGGAAMNAHNADLVLLDLELPDLD     |
| Med-ORF30 | 1  | ----MRVLVVEDERDQAESLIDGLRRHGHDTIVAGSGAEATDAFENADLVLLDLELPDLD   |
| Chai      | 18 | TGGQMRVLVAEPDCESAKLLRQHMRRHGYETEIADTGAGALGSYQYEDLLMLDLELPDLD   |
| GcnR      | 13 | VRKPVRLAVESDSEVAKGLVRDLWRHGYQAESVPTGAQALQQYRNADLVLLDLELPDLD    |
| SchA25    | 61 | ARGVLRVLVVESGAPAAQSLVLSLARHGYQAVSVDTGSKALQKYREADVLVLLDLELPDLD  |

  

|           |     |                                                               |
|-----------|-----|---------------------------------------------------------------|
| Aur1P     | 97  | GLEVCRGIRAAHEIPVIAVTARGSELDRVLGLOAGAADDYLAKPYGFRELMARMEAVMRR- |
| FarR1     | 98  | GLEVCRGIRAAHEIPVIAVTARGSELDRVLGLOAGAADDYLKPYGFRELMARMEAVMRR-  |
| PgaR1     | 101 | GLEVCRGIRAVSDTPIIAVTARGNELDRVLGLOAGSDDYLKPYGFRELMARIEAVMRR-   |
| Med-ORF30 | 57  | GLEVCRRMRAAGDTPIISFAGESAEELDRVLGLOAGSDDCLERPYSFRELMARIDAVMRR- |
| Chai      | 78  | GLEVCRSIRTTSDPIIAFTSHGTELDRVLGLOAGCDDCLVKPFGFRELVARIEAMRR-    |
| GcnR      | 73  | GVELCRSIRALCDVPIIVVTARDELDRLVMSLRAGSDDYVVKPYSLAELIARIEAVMRR-  |
| SchA25    | 121 | GIEICRFVRAASGVGVIVVTARDELDRLVLSLKAGAADDYVVKPYSLELMARIEAVMRR-  |

  

|           |     |                                                               |
|-----------|-----|---------------------------------------------------------------|
| Aur1P     | 156 | ARPTR--PASATITCGPLSIDSGTREVTLDGVPVETTRKEFDMLYLLASHEDTVIPRKML  |
| FarR1     | 157 | ARPSR--PAAATITCGPLRIDAGTREVTLHGEPVETTRKEFDMLYLLASHEDTVIPRKML  |
| PgaR1     | 160 | SGPRT--ETARATSHGPLHIDSARREVTLDGDSVELTRKEFDLLHLLALRPGAVISRRL   |
| Med-ORF30 | 116 | VGARIGGQRRPTLSRGGLSLDSESRREVLDGRPIPLTRKEFDLLHYLASRPGVVSQRRL   |
| Chai      | 137 | IRPRA--VRSQRLSHGPLHIDRDRREVTLDHTQVKVTRKEFDLLQFLASQPTTVFSREQL  |
| GcnR      | 133 | VRQPA--SPDEVVVVGPLSIDPRARETRLDRTIEVTRKEFDLLYLLASRPGIVVTREQL   |
| SchA25    | 180 | VRPLP--LTTEVLTSSGPLRIDSRTRERLGDPEFVEVTRKEFDLLYLLASRPGSVVSRKQI |

  

|           |     |                                                          |
|-----------|-----|----------------------------------------------------------|
| Aur1P     | 214 | MQQVWGDS-----WSRR--TVDTHVSTLRNKIG-AGWIITIRGVGFRFGQG---   |
| FarR1     | 215 | MQQVWGDS-----WSRR--TVDTHVSTLRNKIG-ANWIITIRGVGFRFGQG---   |
| PgaR1     | 218 | MAQVWEDS-----WSRRGRTIDTHVSSLRGKLGSSSWIITVRGVGFRFRLGHP--- |
| Med-ORF30 | 176 | MIDVWGHPADV-GLSAQASRTIDTHVSSMRSKLRESGWITVRGVGFRFRQD---   |
| Chai      | 195 | MTEVWGASLPGGALGSNIARTIDTHVGTLRNKLGSSEWIITVRGVGFRFGGVQQS  |
| GcnR      | 191 | MVQVWRDS-----RSVPGRTIDTHVSSLRSKLGSSDWIITARGVGFRFLGRA---  |
| SchA25    | 238 | MTLVWGDS-----RSQPGRTIDTHVSSLRSKLGSSSWIITARGVGFRFGHA---   |

**Figure S1.** Comparison of Aur1P with similar atypical response regulators (ARRs) from the BGCs containing the *aur10* homologous gene (Figure 6). Protein sequences and accession numbers are: Aur1P of *S. lavendulae* subsp. *lavendulae* CCM 3239 (AAX57187), FarR1 of *S. lavendulae* FRI-5 (BAG74710), PgaR1 of *Streptomyces* sp. PGA64 (AHW57766), Med-ORF30 of *Streptomyces* sp. AM-7161 (BAC79018), Chai of *S. chattanoogensis* L10 (AIU99192), GcnR of *S. lusitanus* (AGO50631), SchA25 of *Streptomyces* sp. SCC-2136 (CAH10125). Identical residues are highlighted in black. Similar residues are shaded. The location of the secondary structure helical elements of homologous OmpR (Novakova et al. 2005) of the DNA-binding effector domain determined from its tertiary structure (Martinez-Hackert and Stock, 1997) are shown above the sequence. The numbers refer to the deposited amino acid sequences in databases.

## References

- Martinez-Hackert, E; Stock, A.M. Structural relationships in the OmpR family of winged-helix transcription factors. *J. Mol. Biol.* **1997**, 269, 301-312.
- Novakova, R.; Homerova, D.; Feckova, L.; Kormanec, J. Characterization of a regulatory gene essential for the production of the angucycline-like polyketide antibiotic auricin in *Streptomyces aureofaciens* CCM 3239. *Microbiology-SGM* **2005**, 151, 2693-2706.

NCBI Multiple Sequence Alignment Viewer, Version 1.21.0

| Sequence ID    | Start | Alignment | End | Organism                     |
|----------------|-------|-----------|-----|------------------------------|
| Query_32537    | (*)   | 1         | 293 |                              |
| WP_031943728.1 | (*)   | 1         | 293 | Streptomyces lavendulae      |
| WP_125815156.1 | (*)   | 1         | 293 | Streptomyces sp. WAC0...     |
| WP_007268981.1 | (*)   | 1         | 293 | Streptomyces sp. C           |
| RPF25366.1     | (*)   | 1         | 293 | Streptomyces sp. Ag109...    |
| RK986999.1     | (*)   | 1         | 293 | Streptomyces sp. 3211.6      |
| WP_190187557.1 | (*)   | 1         | 293 | Streptomyces citreus         |
| WP_136214074.1 | (*)   | 1         | 293 | Streptomyces sp. A1136       |
| BAG74709.1     | (*)   | 1         | 293 | Streptomyces lavendulae      |
| WP_214921469.1 | (*)   | 1         | 293 | Streptomyces sp. ISL-98      |
| MBO0735037.1   | (*)   | 1         | 293 | Streptomyces sp. CBM         |
| WP_188280340.1 | (*)   | 1         | 293 | Streptomyces sp. CBM         |
| WP_093715795.1 | (*)   | 1         | 293 | Streptomyces aini            |
| AEM44215.1     | (*)   | 1         | 293 | uncultured bacterium         |
| WP_225844529.1 | (*)   | 1         | 293 | Streptomyces sp. HPF1...     |
| RPK83857.1     | (*)   | 1         | 293 | Streptomyces sp. AD198...    |
| WP_206328142.1 | (*)   | 1         | 293 | Streptomyces sp. 83/20...    |
| WP_190132210.1 | (*)   | 1         | 293 | Streptomyces mashuensis      |
| WP_190623348.1 | (*)   | 1         | 293 | Streptomyces venezuelae      |
| QES19388.1     | (*)   | 1         | 293 | Streptomyces venezuelae      |
| WP_143673252.1 | (*)   | 1         | 293 | Streptomyces scabiei         |
| WP_020141370.1 | (*)   | 1         | 293 | Streptomyces sp. 351M...     |
| WP_121394609.1 | (*)   | 1         | 293 | Actinokinetospora canju...   |
| WP_199335066.1 | (*)   | 1         | 293 | Streptomyces sp. GMR22       |
| WP_189513472.1 | (*)   | 1         | 293 | Streptomyces narbonensis     |
| CAH10120.1     | (*)   | 1         | 293 | Streptomyces sp. SCC...      |
| WP_216588930.1 | (*)   | 1         | 293 | Streptomyces brasiliensis    |
| WP_189111507.1 | (*)   | 1         | 293 | Streptomyces camponot...     |
| AHW57770.1     | (*)   | 1         | 293 | Streptomyces sp. FGA64       |
| MBT2488576.1   | (*)   | 1         | 293 | Streptomyces sp. ISL-96      |
| WP_206441614.1 | (*)   | 1         | 293 | Streptomyces bonitake...     |
| WP_215129277.1 | (*)   | 1         | 293 | Streptomyces sp. ISL-96      |
| WP_073775780.1 | (*)   | 1         | 293 | Streptomyces sp. MJM1...     |
| MBO2892417.1   | (*)   | 1         | 293 | Actinomadura sp. RB99        |
| WP_190853590.1 | (*)   | 1         | 293 | Actinomadura sp. RB99        |
| BAJ07840.1     | (*)   | 1         | 293 | Streptomyces sp. 2238        |
| WP_218039315.1 | (*)   | 1         | 293 | Streptomyces tubercidicus    |
| WP_193776487.1 | (*)   | 1         | 293 | Streptomyces sp. E2N166      |
| WP_128763710.1 | (*)   | 1         | 293 | Micromonospora sp. MW...     |
| WP_235485517.1 | (*)   | 1         | 293 | Streptomyces roseovortic...  |
| WP_169136273.1 | (*)   | 1         | 293 | Streptomyces sp. HNM...      |
| BAV16996.1     | (*)   | 1         | 293 | Streptomyces sp. TK08        |
| MBX750227.1    | (*)   | 1         | 293 | Streptomyces sp. tea 10      |
| WP_120759153.1 | (*)   | 1         | 293 | Streptomyces                 |
| WP_233876960.1 | (*)   | 1         | 293 | Streptomyces sp. 972-TA      |
| WP_143644090.1 | (*)   | 1         | 293 | Streptomyces sp. IB201...    |
| OKD07325.1     | (*)   | 1         | 293 | Streptomyces sp. CB02        |
| WP_161101252.1 | (*)   | 1         | 293 | Actinomadura rayongensis     |
| WP_219822337.1 | (*)   | 1         | 293 | Streptomyces sp. Ru72        |
| WP_070010968.1 | (*)   | 1         | 293 | Streptomyces abyssalis       |
| WP_124265853.1 | (*)   | 1         | 293 | Streptomyces                 |
| WP_162655397.1 | (*)   | 1         | 293 | Streptomyces actuosus        |
| WP_190219409.1 | (*)   | 1         | 293 | Streptomyces griseospor...   |
| WP_123947562.1 | (*)   | 1         | 293 | Streptomyces globisporus     |
| ROV69876.1     | (*)   | 1         | 293 | Streptomyces globisporus     |
| WP_179537186.1 | (*)   | 1         | 293 | Actinopolyspora biskenis     |
| ONK09315.1     | (*)   | 1         | 293 | Streptomyces sp. MP131...    |
| WP_098025994.1 | (*)   | 1         | 293 | Streptomyces sp. st115       |
| WP_165591042.1 | (*)   | 1         | 293 | Streptomyces showdow...      |
| WP_052438253.1 | (*)   | 1         | 293 | Streptacidiphilus jangxi...  |
| WP_200827536.1 | (*)   | 1         | 293 | Thermomonospora echl...      |
| WP_206248469.1 | (*)   | 1         | 293 | Streptomyces bryophytor...   |
| WP_050495769.1 | (*)   | 1         | 293 | Streptomyces baemensis       |
| WP_221505294.1 | (*)   | 1         | 293 | Streptomyces eurocidicus     |
| WP_052687242.1 | (*)   | 1         | 293 | Streptomyces lydicus         |
| WP_207630589.1 | (*)   | 1         | 293 | unclassified Actinopolys...  |
| AIAD7021.1     | (*)   | 1         | 293 | Streptomyces albus           |
| WP_053921784.1 | (*)   | 1         | 293 | Streptomyces chatanoma...    |
| WP_211305172.1 | (*)   | 1         | 293 | Streptomyces alibireticul... |
| WP_051894184.1 | (*)   | 1         | 293 | Streptomyces exfoliat...     |
| WP_059130311.1 | (*)   | 1         | 293 | Streptomyces sp. NRRL...     |
| WP_050504914.1 | (*)   | 1         | 293 | Streptomyces albus           |
| WP_211831744.1 | (*)   | 1         | 293 | Streptomyces asiaticus       |
| ARO44670.1     | (*)   | 1         | 293 | Streptomyces sp.             |
| ARZ71616.1     | (*)   | 1         | 293 | Streptomyces alibireticul... |
| WP_199843978.1 | (*)   | 1         | 293 | Streptomyces alibireticul... |
| AKAD9042.1     | (*)   | 1         | 293 | Streptomyces albus ZPM       |
| WP_221906375.1 | (*)   | 1         | 293 | Streptomyces sp. BHT-5-2     |
| WP_052393332.1 | (*)   | 1         | 293 | Streptomyces roseovortic...  |
| WP_106681612.1 | (*)   | 1         | 293 | Streptosporangium nond...    |
| WP_069772989.1 | (*)   | 1         | 293 | Streptomyces sp. LUP30       |
| AJT68429.3     | (*)   | 1         | 293 | Streptomyces lydicus         |
| WP_211835093.1 | (*)   | 1         | 293 | Streptomyces violaceus...    |
| WP_193463778.1 | (*)   | 1         | 293 | Streptomyces griseus         |
| WP_202233662.1 | (*)   | 1         | 293 | Streptomyces sp. GN-593      |
| WP_220291340.1 | (*)   | 1         | 293 | Streptomyces sp. MBT84       |
| WP_199930774.1 | (*)   | 1         | 293 | Streptomyces sp. CB02        |
| WP_077057266.1 | (*)   | 1         | 293 | Streptomyces sp. MP131...    |
| WP_075845427.1 | (*)   | 1         | 293 | Saccharomonospora sp...      |
| WP_158920617.1 | (*)   | 1         | 293 | Streptomyces sp. NBRC...     |
| 9FL99842.1     | (*)   | 1         | 293 | Streptomyces pini            |
| WP_149829908.1 | (*)   | 1         | 293 | Streptomyces italicensis     |
| WP_169442892.1 | (*)   | 1         | 293 | Streptomyces sp. HNM...      |
| WP_229885625.1 | (*)   | 1         | 293 | Streptomyces nashville...    |
| WP_139238202.1 | (*)   | 1         | 293 | Streptomyces pini            |
| WP_229843810.1 | (*)   | 1         | 293 | Streptomyces tanashi...      |
| GHE66485.1     | (*)   | 1         | 293 | Streptomyces cellulosa...    |
| WP_141706088.1 | (*)   | 1         | 293 | Streptomyces nanshanensis    |
| WP_207315326.1 | (*)   | 1         | 293 | Streptomyces laculifisp...   |
| WP_17614806.1  | (*)   | 1         | 293 | Streptomyces seoulensis      |



| Sequence ID    | Start | Alignment                                     | End | Organism                     |
|----------------|-------|-----------------------------------------------|-----|------------------------------|
| Query_32537    | (*)   | 1 101 110 120 130 140 150 160 170 180 190 200 |     |                              |
| WP_031943728.1 | (*)   | AGCGVAAHLYTHRCGR                              | 293 | Streptomyces lavendulae      |
| WP_125815156.1 | (*)   | AGCGVAAHLYTHRCGR                              | 293 | Streptomyces sp. WAC0...     |
| WP_007268981.1 | (*)   | AGCGVAAHLYTHRCGR                              | 282 | Streptomyces sp. C           |
| RPF25366.1     | (*)   | AGCGVAAHLYTHRCGR                              | 286 | Streptomyces sp. Ag109...    |
| RK986999.1     | (*)   | AGCGVAAHLYTHRCGR                              | 286 | Streptomyces sp. 3211.6      |
| WP_190187557.1 | (*)   | AGCGVAAHLYTHRCGR                              | 279 | Streptomyces citratus        |
| WP_136214074.1 | (*)   | AGCGVAAHLYTHRCGR                              | 277 | Streptomyces sp. A1136       |
| BAG74709.1     | (*)   | AGCGVAAHLYTHRCGR                              | 286 | Streptomyces lavendulae      |
| WP_214921469.1 | (*)   | AGCGVAAHLYTHRCGR                              | 277 | Streptomyces sp. ISL-98      |
| MBD0735037.1   | (*)   | AGCGVAAHLYTHRCGR                              | 298 | Streptomyces sp. CBM         |
| WP_188280340.1 | (*)   | AGCGVAAHLYTHRCGR                              | 301 | Streptomyces sp. CBM         |
| WP_093715795.1 | (*)   | AGCGVAAHLYTHRCGR                              | 305 | Streptomyces sp. aini        |
| AEM44215.1     | (*)   | AGCGVAAHLYTHRCGR                              | 304 | uncultured bacterium         |
| WP_225844529.1 | (*)   | AGCGVAAHLYTHRCGR                              | 276 | Streptomyces sp. HPF1...     |
| RPK83857.1     | (*)   | AGCGVAAHLYTHRCGR                              | 308 | Streptomyces sp. AD198...    |
| WP_206328142.1 | (*)   | AGCGVAAHLYTHRCGR                              | 288 | Streptomyces sp. 83(20...    |
| WP_190132210.1 | (*)   | AGCGVAAHLYTHRCGR                              | 313 | Streptomyces mashunensis     |
| WP_190623348.1 | (*)   | AGCGVAAHLYTHRCGR                              | 304 | Streptomyces venezuelae      |
| QES19388.1     | (*)   | AGCGVAAHLYTHRCGR                              | 291 | Streptomyces venezuelae      |
| WP_143673252.1 | (*)   | AGCGVAAHLYTHRCGR                              | 304 | Streptomyces scabiei         |
| WP_020141370.1 | (*)   | AGCGVAAHLYTHRCGR                              | 285 | Streptomyces sp. 351M...     |
| WP_121394609.1 | (*)   | AGCGVAAHLYTHRCGR                              | 248 | Actinokinetospora canj...    |
| WP_199335066.1 | (*)   | AGCGVAAHLYTHRCGR                              | 284 | Streptomyces sp. GMR22       |
| WP_189513472.1 | (*)   | AGCGVAAHLYTHRCGR                              | 291 | Streptomyces narbonensis     |
| CAH10120.1     | (*)   | AGCGVAAHLYTHRCGR                              | 291 | Streptomyces sp. GOC...      |
| WP_216588930.1 | (*)   | AGCGVAAHLYTHRCGR                              | 304 | Streptomyces brasiliensis    |
| WP_189111507.1 | (*)   | AGCGVAAHLYTHRCGR                              | 315 | Streptomyces camponot...     |
| AHW57770.1     | (*)   | AGCGVAAHLYTHRCGR                              | 316 | Streptomyces sp. FGAE4       |
| MBT2488576.1   | (*)   | AGCGVAAHLYTHRCGR                              | 304 | Streptomyces sp. ISL-96      |
| WP_206441614.1 | (*)   | AGCGVAAHLYTHRCGR                              | 281 | Streptomyces bonnicus        |
| WP_15119277.1  | (*)   | AGCGVAAHLYTHRCGR                              | 292 | Streptomyces sp. ISL-96      |
| WP_073775780.1 | (*)   | AGCGVAAHLYTHRCGR                              | 266 | Streptomyces sp. MUM1...     |
| MBD2892417.1   | (*)   | AGCGVAAHLYTHRCGR                              | 300 | Actinomadura sp. RB99        |
| WP_190853690.1 | (*)   | AGCGVAAHLYTHRCGR                              | 293 | Actinomadura sp. RB99        |
| BAJ07840.1     | (*)   | AGCGVAAHLYTHRCGR                              | 281 | Streptomyces sp. 2238        |
| WP_218039315.1 | (*)   | AGCGVAAHLYTHRCGR                              | 225 | Streptomyces tubercidicus    |
| WP_193776487.1 | (*)   | AGCGVAAHLYTHRCGR                              | 286 | Streptomyces sp. E2N166      |
| WP_128763710.1 | (*)   | AGCGVAAHLYTHRCGR                              | 299 | Micromonospora sp. MW...     |
| WP_235485517.1 | (*)   | AGCGVAAHLYTHRCGR                              | 295 | Streptomyces roseoviridis    |
| WP_169136273.1 | (*)   | AGCGVAAHLYTHRCGR                              | 266 | Streptomyces sp. HNM...      |
| BAV16996.1     | (*)   | AGCGVAAHLYTHRCGR                              | 309 | Streptomyces sp. TK08        |
| MBX7550227.1   | (*)   | AGCGVAAHLYTHRCGR                              | 289 | Streptomyces sp. tea 10      |
| WP_120759153.1 | (*)   | AGCGVAAHLYTHRCGR                              | 291 | Streptomyces                 |
| WP_233876660.1 | (*)   | AGCGVAAHLYTHRCGR                              | 289 | Streptomyces sp. 872-7A      |
| WP_143644090.1 | (*)   | AGCGVAAHLYTHRCGR                              | 278 | Streptomyces sp. iB201...    |
| OKD7325.1      | (*)   | AGCGVAAHLYTHRCGR                              | 296 | Streptomyces sp. CB02...     |
| WP_161101252.1 | (*)   | AGCGVAAHLYTHRCGR                              | 240 | Actinomadura rayongensis     |
| WP_219822337.1 | (*)   | AGCGVAAHLYTHRCGR                              | 284 | Streptomyces sp. Ru72        |
| WP_070010968.1 | (*)   | AGCGVAAHLYTHRCGR                              | 292 | Streptomyces abyssalis       |
| WP_124265853.1 | (*)   | AGCGVAAHLYTHRCGR                              | 256 | Streptomyces                 |
| WP_162655397.1 | (*)   | AGCGVAAHLYTHRCGR                              | 335 | Streptomyces actuosus        |
| WP_190219409.1 | (*)   | AGCGVAAHLYTHRCGR                              | 338 | Streptomyces griseospor...   |
| WP_123947562.1 | (*)   | AGCGVAAHLYTHRCGR                              | 304 | Streptomyces globosporus     |
| ROV69876.1     | (*)   | AGCGVAAHLYTHRCGR                              | 299 | Streptomyces globosporus     |
| WP_179537186.1 | (*)   | AGCGVAAHLYTHRCGR                              | 286 | Actinopolyspora biskrensis   |
| ONK09315.1     | (*)   | AGCGVAAHLYTHRCGR                              | 302 | Streptomyces sp. MP131...    |
| WP_098025994.1 | (*)   | AGCGVAAHLYTHRCGR                              | 320 | Streptomyces sp. st115       |
| WP_165591042.1 | (*)   | AGCGVAAHLYTHRCGR                              | 331 | Streptomyces showdow...      |
| WP_052438253.1 | (*)   | AGCGVAAHLYTHRCGR                              | 290 | Streptacidiphilus jiangxi... |
| WP_200827536.1 | (*)   | AGCGVAAHLYTHRCGR                              | 281 | Thermomonospora echli...     |
| WP_206248469.1 | (*)   | AGCGVAAHLYTHRCGR                              | 246 | Streptomyces bryophytor...   |
| WP_050495769.1 | (*)   | AGCGVAAHLYTHRCGR                              | 319 | Streptomyces baamensis       |
| WP_221505294.1 | (*)   | AGCGVAAHLYTHRCGR                              | 285 | Streptomyces eurocidicus     |
| WP_052687242.1 | (*)   | AGCGVAAHLYTHRCGR                              | 291 | Streptomyces lydicus         |
| WP_207530589.1 | (*)   | AGCGVAAHLYTHRCGR                              | 236 | unclassified Actinopolys...  |
| AIAD7021.1     | (*)   | AGCGVAAHLYTHRCGR                              | 293 | Streptomyces albus           |
| WP_053921784.1 | (*)   | AGCGVAAHLYTHRCGR                              | 291 | Streptomyces chatano...      |
| WP_211305172.1 | (*)   | AGCGVAAHLYTHRCGR                              | 285 | Streptomyces alibireticul... |
| WP_051884184.1 | (*)   | AGCGVAAHLYTHRCGR                              | 305 | Streptomyces exfoliatus      |
| WP_059130311.1 | (*)   | AGCGVAAHLYTHRCGR                              | 283 | Streptomyces sp. NRRL...     |
| WP_050504914.1 | (*)   | AGCGVAAHLYTHRCGR                              | 320 | Streptomyces albus           |
| WP_211831744.1 | (*)   | AGCGVAAHLYTHRCGR                              | 302 | Streptomyces asiaticus       |
| ARO44670.1     | (*)   | AGCGVAAHLYTHRCGR                              | 283 | Streptomyces sp.             |
| ARZ71616.1     | (*)   | AGCGVAAHLYTHRCGR                              | 292 | Streptomyces alibireticul... |
| WP_198843978.1 | (*)   | AGCGVAAHLYTHRCGR                              | 285 | Streptomyces alibireticul... |
| AKA09042.1     | (*)   | AGCGVAAHLYTHRCGR                              | 293 | Streptomyces albus ZPM       |
| WP_221906375.1 | (*)   | AGCGVAAHLYTHRCGR                              | 291 | Streptomyces sp. BHT-5-2     |
| WP_052393332.1 | (*)   | AGCGVAAHLYTHRCGR                              | 289 | Streptomyces roseoviridis    |
| WP_106681612.1 | (*)   | AGCGVAAHLYTHRCGR                              | 297 | Streptoporangium nond...     |
| WP_069772989.1 | (*)   | AGCGVAAHLYTHRCGR                              | 285 | Streptomyces sp. LUP30       |
| AJTB6429.3     | (*)   | AGCGVAAHLYTHRCGR                              | 259 | Streptomyces lydicus         |
| WP_211835093.1 | (*)   | AGCGVAAHLYTHRCGR                              | 265 | Streptomyces violaceus...    |
| WP_193463778.1 | (*)   | AGCGVAAHLYTHRCGR                              | 320 | Streptomyces griseus         |
| WP_202233662.1 | (*)   | AGCGVAAHLYTHRCGR                              | 322 | Streptomyces sp. SN-593      |
| WP_230291340.1 | (*)   | AGCGVAAHLYTHRCGR                              | 283 | Streptomyces sp. MBT84       |
| WP_199930774.1 | (*)   | AGCGVAAHLYTHRCGR                              | 252 | Streptomyces sp. CB02...     |
| WP_077057266.1 | (*)   | AGCGVAAHLYTHRCGR                              | 259 | Streptomyces sp. MP131...    |
| WP_075845427.1 | (*)   | AGCGVAAHLYTHRCGR                              | 279 | Gaccharomonospora sp...      |
| WP_158920617.1 | (*)   | AGCGVAAHLYTHRCGR                              | 253 | Streptomyces pini            |
| SFL98842.1     | (*)   | AGCGVAAHLYTHRCGR                              | 315 | Streptomyces pini            |
| WP_149829908.1 | (*)   | AGCGVAAHLYTHRCGR                              | 292 | Streptomyces talianensis     |
| WP_168443852.1 | (*)   | AGCGVAAHLYTHRCGR                              | 261 | Streptomyces sp. HNM...      |
| WP_22988625.1  | (*)   | AGCGVAAHLYTHRCGR                              | 336 | Streptomyces nashville...    |
| WP_139238202.1 | (*)   | AGCGVAAHLYTHRCGR                              | 300 | Streptomyces pini            |
| WP_229843810.1 | (*)   | AGCGVAAHLYTHRCGR                              | 336 | Streptomyces tanashi...      |
| GHE66465.1     | (*)   | AGCGVAAHLYTHRCGR                              | 280 | Streptomyces cellulosa...    |
| WP_141706088.1 | (*)   | AGCGVAAHLYTHRCGR                              | 297 | Streptomyces nanshensis      |
| WP_207315326.1 | (*)   | AGCGVAAHLYTHRCGR                              | 277 | Streptomyces laculisp...     |
| WP_17614806.1  | (*)   | AGCGVAAHLYTHRCGR                              | 288 | Streptomyces seoulensis      |



NCBI Multiple Sequence Alignment Viewer, Version 1.21.0

| Sequence ID    | Start | Alignment | End | Organism                      |
|----------------|-------|-----------|-----|-------------------------------|
| Query_32537    | (*)   | 1         | 400 |                               |
| WP_031943728.1 | (*)   | 1         | 400 | Streptomyces lavendulae       |
| WP_125815156.1 | (*)   | 1         | 400 | Streptomyces sp. WAC0...      |
| WP_007268981.1 | (*)   | 1         | 400 | Streptomyces sp. C            |
| RPF25366.1     | (*)   | 1         | 400 | Streptomyces sp. Ag109...     |
| RK986999.1     | (*)   | 1         | 400 | Streptomyces sp. 3211.6       |
| WP_190187557.1 | (*)   | 1         | 400 | Streptomyces citratus         |
| WP_136214074.1 | (*)   | 1         | 400 | Streptomyces sp. A1136        |
| BAG74709.1     | (*)   | 1         | 400 | Streptomyces lavendulae       |
| WP_214921469.1 | (*)   | 1         | 400 | Streptomyces sp. ISL-98       |
| MBO0735037.1   | (*)   | 1         | 400 | Streptomyces sp. CBM          |
| WP_188280340.1 | (*)   | 1         | 400 | Streptomyces sp. CBM          |
| WP_093715795.1 | (*)   | 1         | 400 | Streptomyces alni             |
| AEM44215.1     | (*)   | 1         | 400 | uncultured bacterium          |
| WP_225844529.1 | (*)   | 1         | 400 | Streptomyces sp. HPF1...      |
| RPK83857.1     | (*)   | 1         | 400 | Streptomyces sp. AD198...     |
| WP_206328142.1 | (*)   | 1         | 400 | Streptomyces sp. 83(20...     |
| WP_190132210.1 | (*)   | 1         | 400 | Streptomyces mashuensis       |
| WP_190623348.1 | (*)   | 1         | 400 | Streptomyces venezuelae       |
| QES19388.1     | (*)   | 1         | 400 | Streptomyces venezuelae       |
| WP_143673252.1 | (*)   | 1         | 400 | Streptomyces scabiei          |
| WP_020141370.1 | (*)   | 1         | 400 | Streptomyces sp. 351M...      |
| WP_121394609.1 | (*)   | 1         | 400 | Actinokinetospora canj...     |
| WP_199335066.1 | (*)   | 1         | 400 | Streptomyces sp. GMR22        |
| WP_189513472.1 | (*)   | 1         | 400 | Streptomyces narbonne...      |
| CAH10120.1     | (*)   | 1         | 400 | Streptomyces sp. GCC...       |
| WP_216588930.1 | (*)   | 1         | 400 | Streptomyces brasiliac...     |
| WP_189111507.1 | (*)   | 1         | 400 | Streptomyces camponot...      |
| AHW57770.1     | (*)   | 1         | 400 | Streptomyces sp. FGAE4        |
| MBT2488576.1   | (*)   | 1         | 400 | Streptomyces sp. ISL-96       |
| WP_206441614.1 | (*)   | 1         | 400 | Streptomyces boncuke...       |
| WP_215129277.1 | (*)   | 1         | 400 | Streptomyces sp. ISL-96       |
| WP_073775780.1 | (*)   | 1         | 400 | Streptomyces sp. MJM1...      |
| MBO2892417.1   | (*)   | 1         | 400 | Actinomadura sp. RB99         |
| WP_190853690.1 | (*)   | 1         | 400 | Actinomadura sp. RB99         |
| BAJ07840.1     | (*)   | 1         | 400 | Streptomyces sp. 2238...      |
| WP_218039315.1 | (*)   | 1         | 400 | Streptomyces tubercidicus     |
| WP_193776487.1 | (*)   | 1         | 400 | Streptomyces sp. E2N166       |
| WP_128763710.1 | (*)   | 1         | 400 | Micromonospora sp. MW...      |
| WP_235485517.1 | (*)   | 1         | 400 | Streptomyces roseovertic...   |
| WP_169136273.1 | (*)   | 1         | 400 | Streptomyces sp. HNM...       |
| BAV16996.1     | (*)   | 1         | 400 | Streptomyces sp. TK08         |
| MBX7550227.1   | (*)   | 1         | 400 | Streptomyces sp. tea 10       |
| WP_120759153.1 | (*)   | 1         | 400 | Streptomyces                  |
| WP_233876960.1 | (*)   | 1         | 400 | Streptomyces sp. ST2-7A       |
| WP_143644090.1 | (*)   | 1         | 400 | Streptomyces sp. IB201...     |
| OKID7325.1     | (*)   | 1         | 400 | Streptomyces sp. CB02...      |
| WP_161101252.1 | (*)   | 1         | 400 | Actinomadura raysonensis      |
| WP_219822337.1 | (*)   | 1         | 400 | Streptomyces sp. Ru72         |
| WP_070010968.1 | (*)   | 1         | 400 | Streptomyces abyssalis        |
| WP_124265853.1 | (*)   | 1         | 400 | Streptomyces                  |
| WP_126555397.1 | (*)   | 1         | 400 | Streptomyces actuosus         |
| WP_190219409.1 | (*)   | 1         | 400 | Streptomyces griseospor...    |
| WP_123947562.1 | (*)   | 1         | 400 | Streptomyces globospor...     |
| ROV69876.1     | (*)   | 1         | 400 | Streptomyces globospor...     |
| WP_179537186.1 | (*)   | 1         | 400 | Actinopolyspora biskrensis    |
| ONK09315.1     | (*)   | 1         | 400 | Streptomyces sp. MP131...     |
| WP_098025994.1 | (*)   | 1         | 400 | Streptomyces sp. st115        |
| WP_165591042.1 | (*)   | 1         | 400 | Streptomyces showdow...       |
| WP_052438253.1 | (*)   | 1         | 400 | Streptacidiphilus jangxi...   |
| WP_200827536.1 | (*)   | 1         | 400 | Thermomonospora echl...       |
| WP_206248469.1 | (*)   | 1         | 400 | Streptomyces bryophytor...    |
| WP_050495769.1 | (*)   | 1         | 400 | Streptomyces baemensis        |
| WP_221505294.1 | (*)   | 1         | 400 | Streptomyces eurocidicus      |
| WP_052687242.1 | (*)   | 1         | 400 | Streptomyces lydicus          |
| WP_207630589.1 | (*)   | 1         | 400 | unclassified Actinopolys...   |
| AIAD7021.1     | (*)   | 1         | 400 | Streptomyces albulus          |
| WP_053921784.1 | (*)   | 1         | 400 | Streptomyces chatanovo...     |
| WP_211305172.1 | (*)   | 1         | 400 | Streptomyces alibireticul...  |
| WP_051884184.1 | (*)   | 1         | 400 | Streptomyces enfoliatus       |
| WP_059130311.1 | (*)   | 1         | 400 | Streptomyces sp. NRRL...      |
| WP_050504914.1 | (*)   | 1         | 400 | Streptomyces albus            |
| WP_211831744.1 | (*)   | 1         | 400 | Streptomyces asiaticus        |
| ARO44670.1     | (*)   | 1         | 400 | Streptomyces sp.              |
| ARZ71616.1     | (*)   | 1         | 400 | Streptomyces alibireticul...  |
| WP_198843978.1 | (*)   | 1         | 400 | Streptomyces alibireticul...  |
| AKA09042.1     | (*)   | 1         | 400 | Streptomyces albulus ZPM      |
| WP_221906375.1 | (*)   | 1         | 400 | Streptomyces sp. BHT-5-2      |
| WP_052393332.1 | (*)   | 1         | 400 | Streptomyces roseovertic...   |
| WP_106681612.1 | (*)   | 1         | 400 | Streptosporangium nond...     |
| WP_069772989.1 | (*)   | 1         | 400 | Streptomyces sp. LUP30        |
| AJT68429.3     | (*)   | 1         | 400 | Streptomyces lydicus          |
| WP_211835093.1 | (*)   | 1         | 400 | Streptomyces violaceus...     |
| WP_193463778.1 | (*)   | 1         | 400 | Streptomyces griseus          |
| WP_202233662.1 | (*)   | 1         | 400 | Streptomyces sp. GN-593       |
| WP_230291340.1 | (*)   | 1         | 400 | Streptomyces sp. MBT84        |
| WP_199930774.1 | (*)   | 1         | 400 | Streptomyces sp. CB02...      |
| WP_077057266.1 | (*)   | 1         | 400 | Streptomyces sp. MP131...     |
| WP_075845427.1 | (*)   | 1         | 400 | Gaccharomonospora sp. NBRC... |
| WP_158920617.1 | (*)   | 1         | 400 | Streptomyces pini             |
| SFL9842.1      | (*)   | 1         | 400 | Streptomyces talianensis      |
| WP_149829908.1 | (*)   | 1         | 400 | Streptomyces sp. HNM...       |
| WP_168442852.1 | (*)   | 1         | 400 | Streptomyces nashville...     |
| WP_229885625.1 | (*)   | 1         | 400 | Streptomyces pini             |
| WP_139238202.1 | (*)   | 1         | 400 | Streptomyces pini             |
| WP_229843810.1 | (*)   | 1         | 400 | Streptomyces tanashi...       |
| GHE66465.1     | (*)   | 1         | 400 | Streptomyces cellulosa...     |
| WP_141760688.1 | (*)   | 1         | 400 | Streptomyces nanshensis       |
| WP_207315326.1 | (*)   | 1         | 400 | Streptomyces lacuifiss...     |
| WP_176148066.1 | (*)   | 1         | 400 | Streptomyces seoulensis       |

NCBI Multiple Sequence Alignment Viewer, Version 1.21.0

| Sequence ID    | Start | Alignment                                      | End | Organism                     |
|----------------|-------|------------------------------------------------|-----|------------------------------|
| Query_32537    | 1     | NR AGR T F T A G G D V R A C F A R R A Q A R A | 293 | Streptomyces lavendulae      |
| WP_031943728.1 | 1     | NR AGR T F T A G G D V R A C F A R R A Q A R A | 293 | Streptomyces sp. WAC0...     |
| WP_125815156.1 | 1     | NR AGR T F T A G G D V R A C F A R R A Q A R A | 282 | Streptomyces sp. C           |
| WP_007268981.1 | 1     | NR AGR T F T A G G D V R A C F A R R A Q A R A | 286 | Streptomyces sp. Ag109...    |
| RPF25366.1     | 1     | NR AGR T F T A G G D V R A C F A R R A Q A R A | 286 | Streptomyces sp. A1136       |
| RK096999.1     | 1     | NR AGR T F T A G G D V R A C F A R R A Q A R A | 279 | Streptomyces lavendulae      |
| WP_190187557.1 | 1     | NR AGR T F T A G G D V R A C F A R R A Q A R A | 277 | Streptomyces sp. ISL-98      |
| WP_136214074.1 | 1     | NR AGR T F T A G G D V R A C F A R R A Q A R A | 298 | Streptomyces sp. CBM         |
| BAG74709.1     | 1     | NR AGR T F T A G G D V R A C F A R R A Q A R A | 301 | Streptomyces sp. CBM         |
| WP_214921469.1 | 1     | NR AGR T F T A G G D V R A C F A R R A Q A R A | 305 | Streptomyces aini            |
| MBO0735037.1   | 1     | NR AGR T F T A G G D V R A C F A R R A Q A R A | 304 | uncultured bacterium         |
| WP_188280340.1 | 1     | NR AGR T F T A G G D V R A C F A R R A Q A R A | 276 | Streptomyces sp. HPF1...     |
| WP_093715795.1 | 1     | NR AGR T F T A G G D V R A C F A R R A Q A R A | 308 | Streptomyces sp. AD198...    |
| AEM44215.1     | 1     | NR AGR T F T A G G D V R A C F A R R A Q A R A | 288 | Streptomyces sp. 03/20...    |
| WP_225844529.1 | 1     | NR AGR T F T A G G D V R A C F A R R A Q A R A | 313 | Streptomyces mashuensis      |
| RPK83857.1     | 1     | NR AGR T F T A G G D V R A C F A R R A Q A R A | 304 | Streptomyces venezuelae      |
| WP_206328142.1 | 1     | NR AGR T F T A G G D V R A C F A R R A Q A R A | 291 | Streptomyces venezuelae      |
| WP_190132210.1 | 1     | NR AGR T F T A G G D V R A C F A R R A Q A R A | 304 | Streptomyces scabiei         |
| WP_190623348.1 | 1     | NR AGR T F T A G G D V R A C F A R R A Q A R A | 285 | Streptomyces sp. 351M...     |
| QES19388.1     | 1     | NR AGR T F T A G G D V R A C F A R R A Q A R A | 248 | Actinokineospora canju...    |
| WP_143673252.1 | 1     | NR AGR T F T A G G D V R A C F A R R A Q A R A | 284 | Streptomyces sp. GMR22       |
| WP_020141370.1 | 1     | NR AGR T F T A G G D V R A C F A R R A Q A R A | 291 | Streptomyces narbonensis     |
| WP_121394609.1 | 1     | NR AGR T F T A G G D V R A C F A R R A Q A R A | 291 | Streptomyces sp. GCC ...     |
| WP_199335066.1 | 1     | NR AGR T F T A G G D V R A C F A R R A Q A R A | 304 | Streptomyces brasiliac...    |
| WP_189513472.1 | 1     | NR AGR T F T A G G D V R A C F A R R A Q A R A | 315 | Streptomyces camponot...     |
| CAH10120.1     | 1     | NR AGR T F T A G G D V R A C F A R R A Q A R A | 316 | Streptomyces sp. FGA64       |
| WP_216588930.1 | 1     | NR AGR T F T A G G D V R A C F A R R A Q A R A | 304 | Streptomyces sp. ISL-96      |
| WP_189111507.1 | 1     | NR AGR T F T A G G D V R A C F A R R A Q A R A | 281 | Streptomyces boncuke...      |
| AHW57770.1     | 1     | NR AGR T F T A G G D V R A C F A R R A Q A R A | 292 | Streptomyces sp. ISL-96      |
| MBT2488576.1   | 1     | NR AGR T F T A G G D V R A C F A R R A Q A R A | 266 | Streptomyces sp. MJM1...     |
| WP_206441614.1 | 1     | NR AGR T F T A G G D V R A C F A R R A Q A R A | 300 | Actinomadura sp. RB99        |
| WP_215129277.1 | 1     | NR AGR T F T A G G D V R A C F A R R A Q A R A | 293 | Actinomadura sp. RB99        |
| WP_073775780.1 | 1     | NR AGR T F T A G G D V R A C F A R R A Q A R A | 281 | Streptomyces sp. 2238        |
| MBO2892417.1   | 1     | NR AGR T F T A G G D V R A C F A R R A Q A R A | 225 | Streptomyces tubercidicus    |
| WP_190835390.1 | 1     | NR AGR T F T A G G D V R A C F A R R A Q A R A | 286 | Streptomyces sp. E2N166      |
| BAJ07840.1     | 1     | NR AGR T F T A G G D V R A C F A R R A Q A R A | 299 | Micromonospora sp. MW...     |
| WP_218039315.1 | 1     | NR AGR T F T A G G D V R A C F A R R A Q A R A | 295 | Streptomyces roseovortic...  |
| WP_193776487.1 | 1     | NR AGR T F T A G G D V R A C F A R R A Q A R A | 266 | Streptomyces sp. HNM...      |
| WP_128763710.1 | 1     | NR AGR T F T A G G D V R A C F A R R A Q A R A | 309 | Streptomyces sp. TK08        |
| WP_235485517.1 | 1     | NR AGR T F T A G G D V R A C F A R R A Q A R A | 289 | Streptomyces sp. tea 10      |
| WP_169136273.1 | 1     | NR AGR T F T A G G D V R A C F A R R A Q A R A | 291 | Streptomyces                 |
| BAV16996.1     | 1     | NR AGR T F T A G G D V R A C F A R R A Q A R A | 289 | Streptomyces sp. 072-7A      |
| MBX7550227.1   | 1     | NR AGR T F T A G G D V R A C F A R R A Q A R A | 278 | Streptomyces sp. IB201...    |
| WP_120759153.1 | 1     | NR AGR T F T A G G D V R A C F A R R A Q A R A | 296 | Streptomyces sp. CB02...     |
| WP_233878960.1 | 1     | NR AGR T F T A G G D V R A C F A R R A Q A R A | 240 | Actinomadura rayongensis     |
| WP_143644090.1 | 1     | NR AGR T F T A G G D V R A C F A R R A Q A R A | 284 | Streptomyces sp. Ru72        |
| OKID7325.1     | 1     | NR AGR T F T A G G D V R A C F A R R A Q A R A | 292 | Streptomyces abyssalis       |
| WP_161101252.1 | 1     | NR AGR T F T A G G D V R A C F A R R A Q A R A | 256 | Streptomyces                 |
| WP_219822337.1 | 1     | NR AGR T F T A G G D V R A C F A R R A Q A R A | 335 | Streptomyces actuosus        |
| WP_070010968.1 | 1     | NR AGR T F T A G G D V R A C F A R R A Q A R A | 338 | Streptomyces griseospo...    |
| WP_124265853.1 | 1     | NR AGR T F T A G G D V R A C F A R R A Q A R A | 304 | Streptomyces globosporus     |
| WP_162655397.1 | 1     | NR AGR T F T A G G D V R A C F A R R A Q A R A | 299 | Streptomyces globosporus     |
| WP_190219409.1 | 1     | NR AGR T F T A G G D V R A C F A R R A Q A R A | 286 | Actinopolyspora biskrensis   |
| WP_123947562.1 | 1     | NR AGR T F T A G G D V R A C F A R R A Q A R A | 302 | Streptomyces sp. MP131...    |
| ROV69876.1     | 1     | NR AGR T F T A G G D V R A C F A R R A Q A R A | 320 | Streptomyces sp. st115       |
| WP_179537186.1 | 1     | NR AGR T F T A G G D V R A C F A R R A Q A R A | 331 | Streptomyces showdoe...      |
| ONK09315.1     | 1     | NR AGR T F T A G G D V R A C F A R R A Q A R A | 290 | Streptacidiphilus jiangxi... |
| WP_098025994.1 | 1     | NR AGR T F T A G G D V R A C F A R R A Q A R A | 281 | Thermomonospora echl...      |
| WP_165591042.1 | 1     | NR AGR T F T A G G D V R A C F A R R A Q A R A | 246 | Streptomyces bryophytor...   |
| WP_052438253.1 | 1     | NR AGR T F T A G G D V R A C F A R R A Q A R A | 319 | Streptomyces baamensis       |
| WP_200827536.1 | 1     | NR AGR T F T A G G D V R A C F A R R A Q A R A | 285 | Streptomyces euroclidicus    |
| WP_206248469.1 | 1     | NR AGR T F T A G G D V R A C F A R R A Q A R A | 291 | Streptomyces lydicus         |
| WP_050495769.1 | 1     | NR AGR T F T A G G D V R A C F A R R A Q A R A | 236 | unclassified Actinopolys...  |
| WP_221505294.1 | 1     | NR AGR T F T A G G D V R A C F A R R A Q A R A | 293 | Streptomyces albulus         |
| WP_052687242.1 | 1     | NR AGR T F T A G G D V R A C F A R R A Q A R A | 291 | Streptomyces chatanoo...     |
| WP_207630589.1 | 1     | NR AGR T F T A G G D V R A C F A R R A Q A R A | 285 | Streptomyces albireticul...  |
| AIAD7021.1     | 1     | NR AGR T F T A G G D V R A C F A R R A Q A R A | 305 | Streptomyces exfoliatus      |
| WP_053921784.1 | 1     | NR AGR T F T A G G D V R A C F A R R A Q A R A | 283 | Streptomyces sp. NRRL...     |
| WP_211305172.1 | 1     | NR AGR T F T A G G D V R A C F A R R A Q A R A | 320 | Streptomyces albus           |
| WP_051894184.1 | 1     | NR AGR T F T A G G D V R A C F A R R A Q A R A | 302 | Streptomyces asiaticus       |
| WP_059130311.1 | 1     | NR AGR T F T A G G D V R A C F A R R A Q A R A | 283 | Streptomyces sp.             |
| WP_050504914.1 | 1     | NR AGR T F T A G G D V R A C F A R R A Q A R A | 292 | Streptomyces albireticul...  |
| WP_211831744.1 | 1     | NR AGR T F T A G G D V R A C F A R R A Q A R A | 285 | Streptomyces albireticul...  |
| ARO44670.1     | 1     | NR AGR T F T A G G D V R A C F A R R A Q A R A | 293 | Streptomyces albulus ZPM     |
| ARZ71616.1     | 1     | NR AGR T F T A G G D V R A C F A R R A Q A R A | 291 | Streptomyces sp. BHT-5-2     |
| WP_199843978.1 | 1     | NR AGR T F T A G G D V R A C F A R R A Q A R A | 289 | Streptomyces roseovortic...  |
| AKA09042.1     | 1     | NR AGR T F T A G G D V R A C F A R R A Q A R A | 297 | Streptosporangium nond...    |
| WP_221906375.1 | 1     | NR AGR T F T A G G D V R A C F A R R A Q A R A | 285 | Streptomyces sp. LUP30       |
| WP_052393332.1 | 1     | NR AGR T F T A G G D V R A C F A R R A Q A R A | 259 | Streptomyces lydicus         |
| WP_106681612.1 | 1     | NR AGR T F T A G G D V R A C F A R R A Q A R A | 265 | Streptomyces violaceus...    |
| WP_069772989.1 | 1     | NR AGR T F T A G G D V R A C F A R R A Q A R A | 320 | Streptomyces griseus         |
| AJT68429.3     | 1     | NR AGR T F T A G G D V R A C F A R R A Q A R A | 322 | Streptomyces sp. GN-593      |
| WP_211835093.1 | 1     | NR AGR T F T A G G D V R A C F A R R A Q A R A | 283 | Streptomyces sp. MBT84       |
| WP_193463778.1 | 1     | NR AGR T F T A G G D V R A C F A R R A Q A R A | 252 | Streptomyces sp. CB02...     |
| WP_202233662.1 | 1     | NR AGR T F T A G G D V R A C F A R R A Q A R A | 259 | Streptomyces sp. MP131...    |
| WP_220291340.1 | 1     | NR AGR T F T A G G D V R A C F A R R A Q A R A | 279 | Gaccharomonospora sp...      |
| WP_199930774.1 | 1     | NR AGR T F T A G G D V R A C F A R R A Q A R A | 253 | Streptomyces sp. NBRC...     |
| WP_077057266.1 | 1     | NR AGR T F T A G G D V R A C F A R R A Q A R A | 315 | Streptomyces pini            |
| WP_075845427.1 | 1     | NR AGR T F T A G G D V R A C F A R R A Q A R A | 292 | Streptomyces talianensis     |
| WP_158920617.1 | 1     | NR AGR T F T A G G D V R A C F A R R A Q A R A | 261 | Streptomyces sp. HNM...      |
| SFL99842.1     | 1     | NR AGR T F T A G G D V R A C F A R R A Q A R A | 336 | Streptomyces nashville...    |
| WP_149829908.1 | 1     | NR AGR T F T A G G D V R A C F A R R A Q A R A | 300 | Streptomyces pini            |
| WP_169442852.1 | 1     | NR AGR T F T A G G D V R A C F A R R A Q A R A | 336 | Streptomyces tanashi...      |
| WP_229885625.1 | 1     | NR AGR T F T A G G D V R A C F A R R A Q A R A | 280 | Streptomyces cellulosa...    |
| WP_139238202.1 | 1     | NR AGR T F T A G G D V R A C F A R R A Q A R A | 297 | Streptomyces nanshensis      |
| WP_229843810.1 | 1     | NR AGR T F T A G G D V R A C F A R R A Q A R A | 277 | Streptomyces laculatisp...   |
| GHE66465.1     | 1     | NR AGR T F T A G G D V R A C F A R R A Q A R A | 288 | Streptomyces seoulensis      |
| WP_141760688.1 | 1     | NR AGR T F T A G G D V R A C F A R R A Q A R A |     |                              |
| WP_207315326.1 | 1     | NR AGR T F T A G G D V R A C F A R R A Q A R A |     |                              |
| WP_17614806.1  | 1     | NR AGR T F T A G G D V R A C F A R R A Q A R A |     |                              |

**Figure S2.** Comparison of Aur1O with similar proteins from unknown BGCs. Protein sequences and accession numbers are in the left column. Aur1O from *S. lavendulae* subsp. *lavendulae* CCM 3239 (AAK59995) is referred to as Query\_32537. The Aur1O amino acid sequence comparison with the non-redundant protein database was performed using a BlastP browser and NCBI multiple sequence alignment viewer (<https://blast.ncbi.nlm.nih.gov/>). The numbers refer to the deposited amino acid sequences in databases.

**Table S1.** Oligonucleotides used in this study. Cloning sites are underlined.

| Oligonucleotide | Sequence (5' – 3')                                                           |
|-----------------|------------------------------------------------------------------------------|
| aur1AFw         | CGCAGTCCGTCACCGAGACCC                                                        |
| aur1ARv         | CGTCGTAGGTGATCTCCAGTCC                                                       |
| aur1OdDir       | CCGACCAGCGACCACAGACACGAGCCGAGGGGGAACGACATTCCGGGG<br>ATCCGTCGACC              |
| aur1OdRev       | CCTGCGCCCTGCGGGCGAAGCAGGCGCGGACGTCGCCCTCTGTAGGCTG<br>GAGCTGCTTC              |
| aur1OCla        | CCCCATCGATCCGAGGGGGAACGACATGACG                                              |
| aur1OXba        | CCCCCTCTAGAGCTCAGGCGCGGGCCTGCGCCC                                            |
| aur1AS1dir      | CGTGGCCTTGACACTCCCTTGGC                                                      |
| aur1AS1rev      | CGCCGCTCCAGACGTTCGAGGACG                                                     |
| aur1ApDir       | CCCCGGATCCCAATTGCCGCTAGCCCCCTTAAGCCATTAATCCTTCGAAGGAC<br>CCGCACAGCAACCGGTAGG |
| aur1ApRev       | CCCCGGTACCCGCTCCGGAGACAGTGCACCG                                              |
| aur1PpDir       | CCCCGATATCCCCGATTTAACCCTTTTATCGGC                                            |
| aur1PpRev       | CCCCTTCGAAGGTCCGGCCGGGCTCAGCCCTGG                                            |
| aur1OpRev       | CCCCTTCGAAGGGAACGTCGTGCGGAAGACCGG                                            |
| luxCrev         | GCTCTCGGGGAAGATCTCGACCTGG                                                    |
| pMU1fd          | CGGACGGTTCGGCCCCCTTTTTTGG                                                    |
| aur1PDHdir      | GGGGTCTAGACCATATGAACCAGCGGACCATGGCTGTGC                                      |
| aur1PDHrev      | GGGGGTACCTCGAGTCAGCCCTGGCCGAAGCGGAATCC                                       |
| aur1ODHdir      | GGGGTCTAGACCATATGACGGTGACCGCGCTGTGCCACG                                      |
| aur1ODHrev      | GGGGGTACCTCGAGTCAGGCGCGGGCCTGCGCCCTGC                                        |
| KT25dir         | GCCATTATGCCGCATCTGTCC                                                        |
| KT25rev         | GCGATTAAGTTGGGTAACGCC                                                        |
| UT18Cdir        | GCGTGCCGAGCGGACGTTTCG                                                        |
| UT18Crev        | CGGGGCTGGCTTAACCTATGC                                                        |
